# Supplementary material for: Comparing Native Crystal Structures and AlphaFold2 Predicted Water-Soluble G Protein-Coupled Receptor QTY Variants
Source: MDPI journal article supplement (doi:10.3390/life11121285), 2021-11-24

## Supplementary Materials

We carried out additional AlphaFold2 prediction of CXCR4<sup>QTY</sup> where we replaced all QTY amino acids to alanine, as people have been using the “Alanine Scan” for generating and studying mutations. We name the new variant CXCR4<sup>Ala</sup>. This CXCR4<sup>Ala</sup> was subjected to AlphaFold2 prediction and the structure is then superimposed with the CXCR4<sup>QTY</sup>. Since Alanine often found in alpha-helical structures, it is not surprising the structures have little change. Likewise, we also use AlphaFold2 prediction for **i)** CCR5<sup>Arg</sup> and **ii)** CCR5<sup>Gly</sup> and superimposed CCR5<sup>QTY</sup> with **i)** CCR5<sup>Arg</sup> and **ii)** CCR5<sup>Gly</sup>. The superimposed structures and the RMSDs are shown in Figure S1. CXCR4<sup>QTY</sup> and CXCR4<sup>Ala</sup>

### A) Protein sequence of CXCR4<sup>QTY</sup>

MEGISIYTS DNYTEEMGSGDYDSMKEPCFREENANFNKTYQPTTYSTTYQTGTTGQGQTTQTMGYQKKQRSMTDKY  
RQHQSTADQQYTTTTQPYWATDATANWYFGNFQCKATHTTYTTQQYSSTQTQAYTSQDRYLAIVHATNSQRPRKQQA  
EKTTYTGWTPAQQTTPDYTYANVSEADRYICDRFYPNDLWTTTTYQYQHTMTGQTQP GTTTQSCYCTTTSKLSHS  
KGHQKRKALKTTTTTQTQAYYACWQPYYTGTSTDSFILLEI IKQGCEFENTVHKWTSTTEAQAYYHCCQQPTQYAYQG  
AKYKTSAQHAQTSTSRGSSQKTQSKGKRGGHSSTSESESSSFHSS

### B) Protein sequence of CXCR4<sup>Ala</sup>

MEGISIYTS DNYTEEMGSGDYDSMKEPCFREENANFNKIFLPTAYSAAAATGAAGNGAAAAAMGYQKKLRSMTDKYR  
AHASADAAAAATAPAWAADAVANWYFGNFLCKAAHAAYTANAYSSAAAAAASADRYLAIVHATNSQRPRKLLAEK  
AAYAGAWAPAAAATAPDAAAANVSEADRYICDRFYPNDLWVVVAQAQHAMAGAAAPGAAAASCYCAISKLSHSGK  
HQRKALKTTAAAAAAAACWAPYYAGASADSAILLEI IKQGCEFENTVHKWASATEAAAAAHCCANPAAYAAAGAKF  
KTSAQHALTSVSRGSSLKILSKGKRGGHSSVSTESESSSFHSS

### C) Native Protein sequence of CCR5

MDYQVSSPIYDINYYTSEPCQKINVKQIAARLLPPLYSLVFIFGVGNMLVILILINCKRLKSMTDIYLLNLAISDLFFLLTVP  
FWAHYAAAQWDFGNTMCQLLTGLYFIGFFSGIFFIILLTIDRYLAVVHAVFALKARTVTFGVVTSVITWVAVFASLPGIIF  
TRSQKEGLHYTCSSHPYSQYQFWKNFQTLKIVILGLVPLLMVICYSGILKTLLRCRNEKKRHRVRLIFTIMIVYFLF  
WAPYNIVLLLNTFQEFFGLNNCSSSNRLDQAMQVTETLGMTHCCINPIIYAFVGEKFRNYLLVFFQKHI AKRFCKCCSIF  
QQEAPERASSVYTRSTGEQEISVGL

### D) Protein sequence of CCR5<sup>QTY</sup>

MDYQVSSPIYDINYYTSEPCQKINVKQIAARLLPPQYSQTYTYGYTGNMQTTQTQTNCKRLKSMTDIYQQNQATSDQY  
YQQTTPYWAHYAAAQWDFGNTMCQLLTGQYYTGYSGTYTTQQTDDRYLAVVHAVFALKARTVTYGTTTSTTTWT  
TATYASQPGTTYTRSQKEGLHYTCSSHPYSQYQFWKNFQTLKITTTGQQTQPQQTMTTCYSGTQKTQLRCRNEKKR  
HRATRQTYTTMTTYQYWAPYNTTQQLNTFQEFFGLNNCSSSNRLDQAMQVTETLGMTHCCINPIIYAFVGEKFRNYL  
LVFFQKHI AKRFCKCCSIFQQEAPERASSVYTRSTGEQEISVGL

### E) Protein sequence of CCR5<sup>Arg</sup>

MDYQVSSPIYDINYYTSEPCQKINVKQIAARLLPPRYSRRRRRRGRGNMRRRRRRRNCKRLKSMTDIYRRNRARS DR  
RRRRTRPRWAHYAAAQWDFGNTMCQLLTGRYRRGRRSGRRRRRRRRTDRYLAVVHAVFALKARTVTRGRRTSRRT  
WRRARRASRPGRRRTRSQKEGLHYTCSSHPYSQYQFWKNFQTLKIRRRGRRRPRRRMRRCYSGRRKTRLRCRNE  
KKRHRARRRRRRTRMRRYRRRWAPYNNRRRLNTFQEFFGLNNCSSSNRLDQAMQVTETLGMTHCCINPIIYAFVGEKFR  
NYLLVFFQKHI AKRFCKCCSIFQQEAPERASSVYTRSTGEQEISVGL

### F) Protein sequence of CCR5<sup>Gly</sup>

MDYQVSSPIYDINYYTSEPCQKINVKQIAARLLPPGYSGGGGGGGGNMGGGGGGGNCKRLKSMTDIYGGNGAGSD  
GGGGGTGPGWAHYAAAQWDFGNTMCQLLTGGYGGGGSGGGGGGGGTGDRYLAVVHAVFALKARTVTGGGGTS  
GGTWGGAGGASGPGGGGTRSQKEGLHYTCSSHPYSQYQFWKNFQTLKIGGGGGGPGGGMGGCYSGGGKTGL  
RCRNEKKRHRAGRGGGTGMGGYGGGWAPYNGGGGLNTFQEFFGLNNCSSSNRLDQAMQVTETLGMTHCCINPIIY  
AFVGEKFRNYLLVFFQKHI AKRFCKCCSIFQQEAPERASSVYTRSTGEQEISVGL

G) CXCR4<sup>QTY</sup> vs CXCR4<sup>Ala</sup>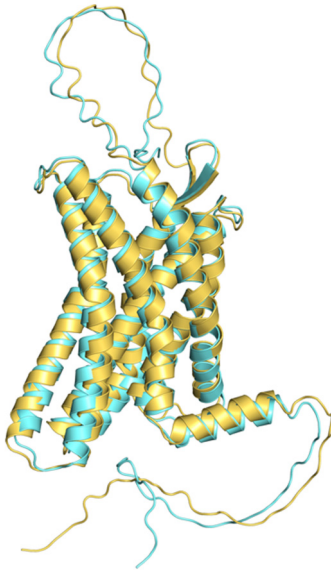H) CCR5<sup>QTY</sup> vs CCR5<sup>Arg</sup>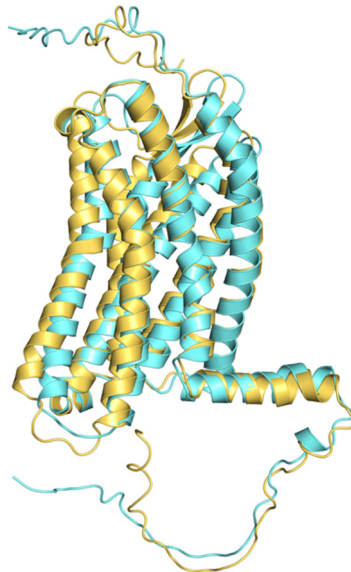I) CCR5<sup>QTY</sup> vs CCR5<sup>Gly</sup>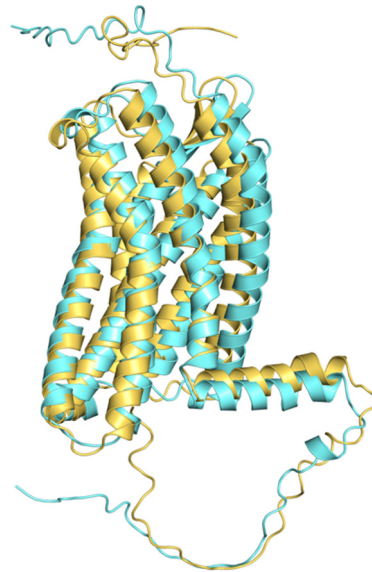

**Figure S1. Superimposed AlphaFold2 predicted structures of CXCR4<sup>QTY</sup>, CXCR4<sup>Ala</sup> and CCR5<sup>QTY</sup> with CCR5<sup>Arg</sup> and CCR5<sup>Gly</sup>.** The protein structures are predicted using AlphaFold2, A) Protein sequence of CXCR4<sup>QTY</sup>, B) Protein sequence of CXCR4<sup>Ala</sup>, C) Protein sequence of CCR5<sup>QTY</sup>. The superimposed structures of CXCR4<sup>QTY</sup> (cyan color) and CXCR4<sup>Ala</sup> (yellow color), G) superimposed CXCR4<sup>QTY</sup> and CXCR4<sup>Ala</sup>, H) superimposed CCR5<sup>QTY</sup> and CCR5<sup>Arg</sup> (RMSD = 5.140), I) superimposed CCR5<sup>QTY</sup> and CCR5<sup>Gly</sup> (RMSD = 6.169). The loops, N-and C-termini predictions are less accurate. Since Alanine are often found in alpha-helical structures, it is not surprising the structures have little change. On the other hand, glycine sometime destabilizes alpha-helical structures, the superimposed structures have bigger deviations.

We used the AlphaFold to predict 5 structures. Since the 5 predicted structures are similar, for clarity, we only selected one to superimpose with the crystal structure. The 5 AlphaFold to predicted 5 structures are shown in Figure S2.

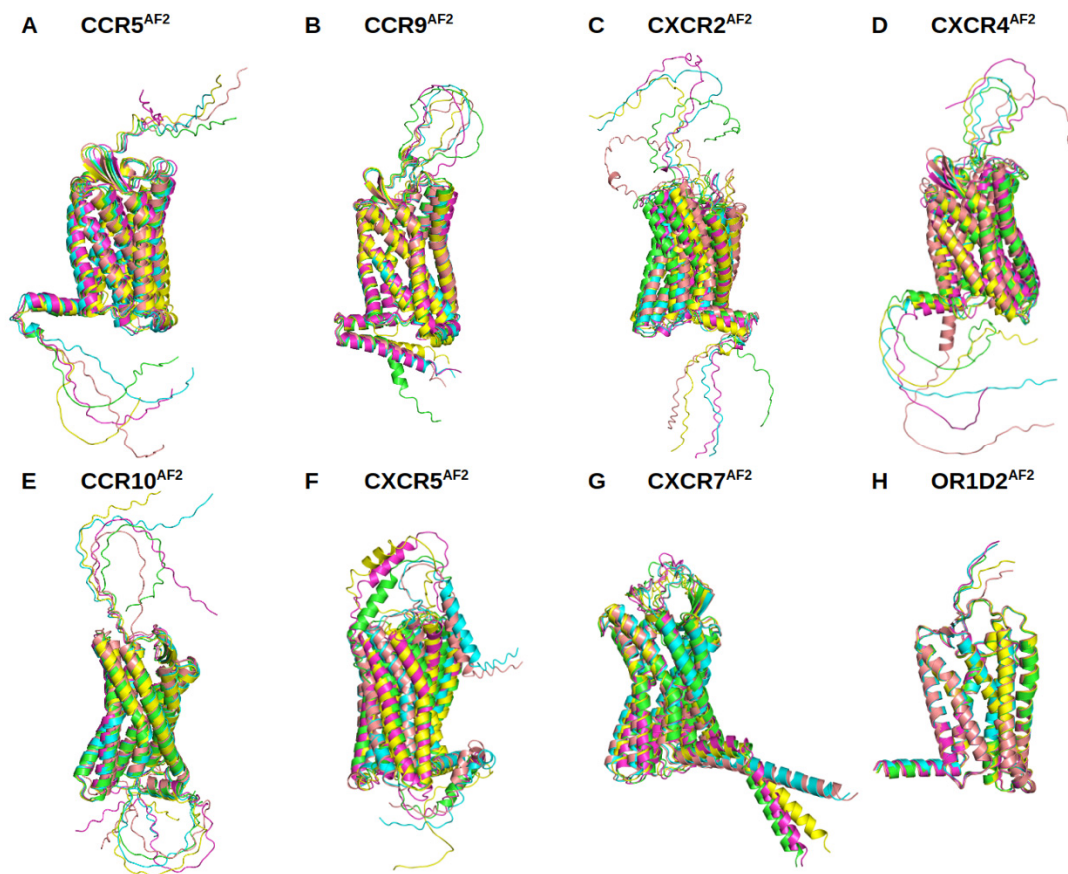

**Figure S2. The AlphaFold2 predicted 5 structures of each GPCR.** As seen from these superimposed structures, the variations are small especially for the transmembrane domains. The 5 colors represent 5 AlphaFold2 different predictions of the same protein sequence. .

All-atom model RMSD (see explanation below):

CCR5\_M = [0.346, 0.281, 0.467, 0.925]

CCR9\_M = [2.310, 2.475, 2.450, 2.228]

CCR10\_M = [0.997, 0.892, 0.759, 0.937]

CXCR2\_M = [0.836, 0.676, 0.773, 0.825]

CXCR4\_M = [1.048, 0.966, 1.010, 4.672]

CXCR5\_M = [9.067, 4.107, 3.431, 8.740]

CXCR7\_M = [4.713, 0.815, 2.069, 4.967]

OR1D2\_M = [0.524, 0.872, 0.499, 1.057]

Average RMSD:

CCR5 = 0.5048

CCR9 = 2.3658

CCR10 = 0.8962

CXCR2 = 0.7775

CXCR4 = 1.9240

CXCR5 = 6.3362

CXCR7 = 3.1410

OR1D2 = 0.7380

AF2 parameters:

homooligomer = 1

msa\_method = mmseqs2

msa\_format = fas

pair\_mode = unpaired

```
pair_cov = 50
pair_qid = 20
rank_by = pLDDT
use_turbo = True
max_msa = 512:1024
show_images = True
num_models = 5
use_ptm = True
num_ensemble = 1
max_recycles = 3
tol = 0
num_samples = 1
subsample_msa = True
num_relax = None
```

Full-atom RMSD (no outlier rejection) and with superposition.

PyMOL command: align QTY and ss H, native and ss H, cycles=0, transform=1.

We superimpose only helices due to loops are not informative concerning the structure prediction, hence this RMSD is only based on helices atoms.

<https://pymolwiki.org/index.php/Align>

**Figure S3.** Five AlphaFold2 predicted models of CCR5<sup>QTY</sup>.

a) Protein sequence of CCR5<sup>QTY</sup>

MDYQVSSPIYDINYYTSEPCQKINVKQIAARLLPPQYSQTYTYGYTGNMQTTQTQTNCKRLKSMTDIYQQNQATSDQY  
YQQTPPYWAHYAAAQWDFGNTMCQLLTGQYYTGYYSGTYTTQQTDRYLAVVHAVFALKARTVTYGTSTTTWT  
TATYASQPGTTYTRSQKEGLHYTCSSHFPYSQYQFWKNFQTLKITTQGQTQPQQTMTTCYSGTQKTQLRCRNEKKR  
HRATRQTYTTMTTYYQYWAPYNTTQQLNTFQEFFGLNNCSSSNRLDQAMQVTETLGMTHCCINPIIYAFVGEKFRNYL  
LVFFQKHIAKRFCKCCSIFQQEAPERASSVYTRSTGEQEISVGL

b) Sequence coverage

Total Length: 352

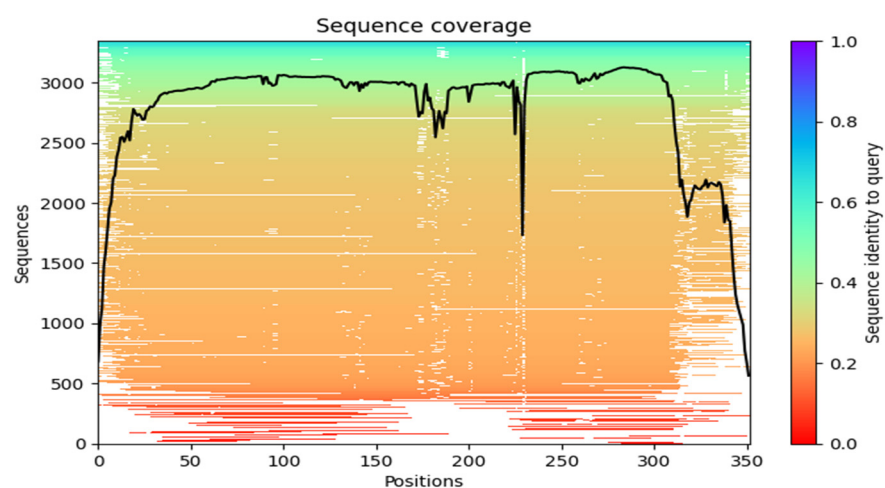

c) model\_1\_ptm\_seed\_0 recycles:3 tol:2.20 pLDDT:78.00 pTMscore:0.76

colored by N→C

colored by pLDDT

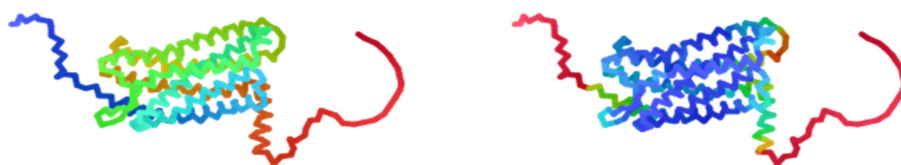

d) model\_2\_ptm\_seed\_0 recycles:3 tol:2.06 pLDDT:74.88 pTMscore:0.75

colored by N→C

colored by pLDDT

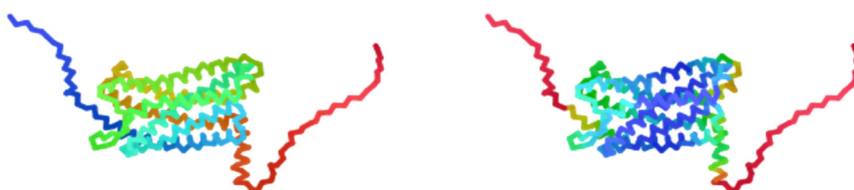

e) model\_3\_ptm\_seed\_0 recycles:3 tol:0.90 pLDDT:82.36 pTMscore:0.79

colored by N→C

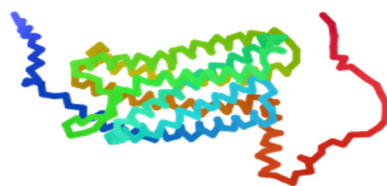

colored by pLDDT

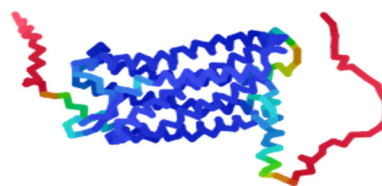

f) model\_4\_ptm\_seed\_0 recycles:3 tol:1.68 pLDDT:80.64 pTMscore:0.79

colored by N→C

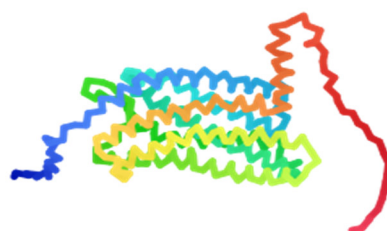

colored by pLDDT

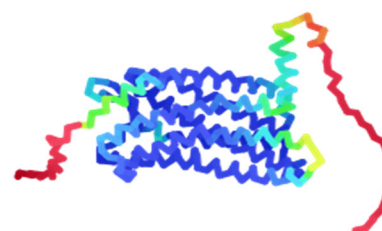

g) model\_5\_ptm\_seed\_0 recycles:3 tol:0.93 pLDDT:80.30 pTMscore:0.79

colored by N→C

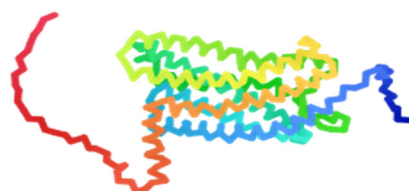

colored by pLDDT

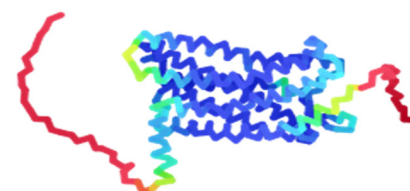

h) model rank based on pLDDT

rank\_1\_model\_3\_ptm\_seed\_0 pLDDT:82.36

rank\_2\_model\_4\_ptm\_seed\_0 pLDDT:80.64

rank\_3\_model\_5\_ptm\_seed\_0 pLDDT:80.30

rank\_4\_model\_1\_ptm\_seed\_0 pLDDT:78.00

rank\_5\_model\_2\_ptm\_seed\_0 pLDDT:74.88

pLDDT: ■ Very low (<50) ■ Low (60) ■ OK (70) ■ Confident (80) ■ Very high (>90)

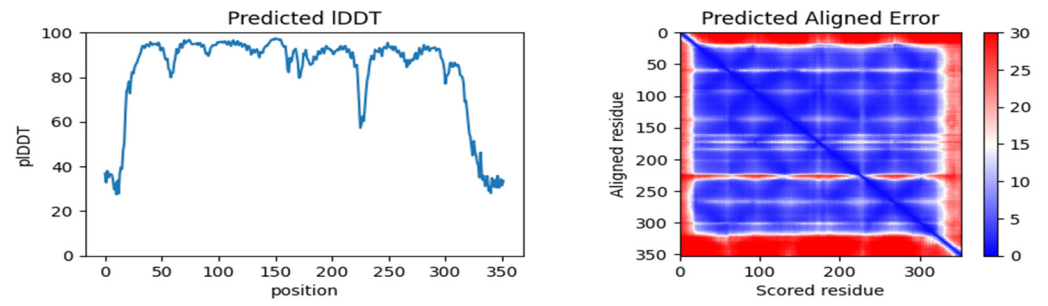

i) predicted alignment error

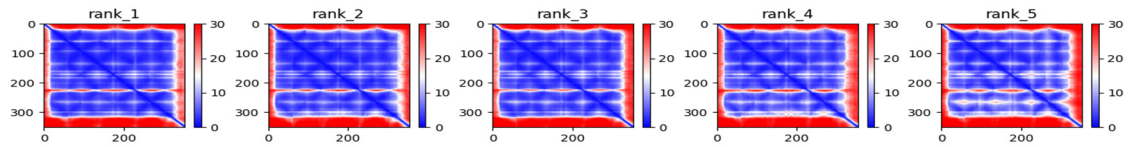

j) predicted contacts

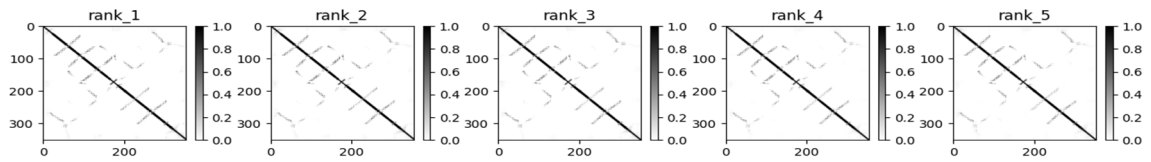

k) predicted distogram

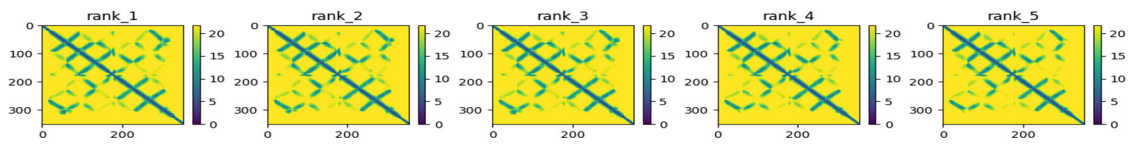

l) predicted LDDT

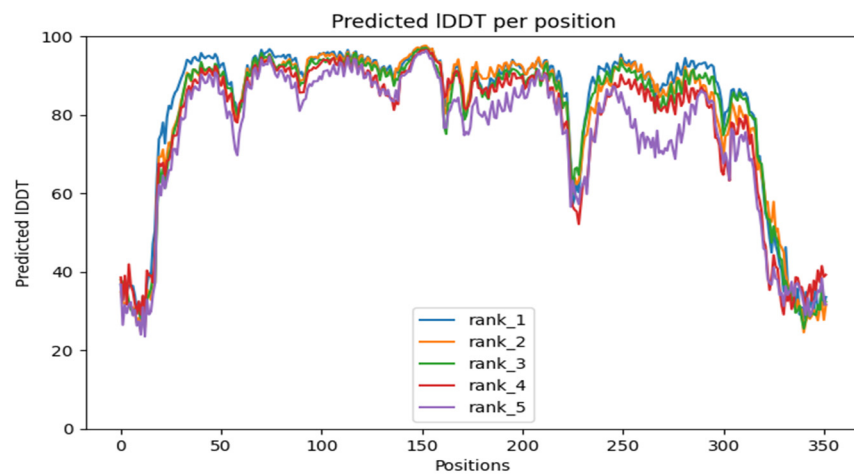

Supplement: s1 [file s1]
